# Supplementary material for: Cryptic diversity: Two morphologically similar species of invasive apple snail in Peninsular Malaysia
Source: PLoS One. 2018 May 7;13(5):e0196582. doi: 10.1371/journal.pone.0196582 (PMC5937749; doi:10.1371/journal.pone.0196582)
Supplement: S1 Table — Sample collection coordinates, qualitative characteristics, shell measurements and landmarks coordinates for each specimen. (CSV) [file pone.0196582.s001.csv]

Latitude	Longitude	Location	Species	Sample ID	Paliap lip pigmented (yellow/orange/red) ( A&B)	Colour of periostracum (A)	Shoulder (angulate) (A&B)	Shell surface (rough) (A)	Suture ( Shallow) (B)	Shell thickness (thick) (A)	umbilicus (narrow) (A&B)	Shell thickness (mm)	Diameter of umbilicus (mm)	Aperture height (mm)	Shell height (mm)	Aperture width (mm)	Shell width (mm)	Shell height - aperture height	spire height: shell height	LM1X	LM1Y	LM2X	LM2Y	LM3X	LM3Y	LM4X	LM4Y	LM5X	LM5Y	LM6X	LM6Y	LM7X	LM7Y	LM8X	LM8Y	LM9X	LM9Y	LM10X	LM10Y	LM11X	LM11Y	LM12X	LM12Y	LM13X	LM13Y	LM14X	LM14Y	LM15X	LM15Y
2.962963	101.696973	Putrajaya	P.maculata	PJ2	1	1	0	0	0	0	0	0.85	4.64	43.025	57.044	32.461	52.901	14.019	0.246	596	250	674	308	752	452	880	456	974	570	998	706	972	814	900	904	778	958	694	940	632	900	594	842	484	776	380	668	342	522
2.962963	101.696973	Putrajaya	P.maculata	PJ3	1	1	0	1	0	1	0	0.91	4.31	37.945	52.399	26.962	43.689	14.454	0.276	562	138	630	198	692	322	804	344	856	438	860	552	836	644	784	732	674	780	602	758	558	712	534	670	428	604	354	502	328	390
2.962963	101.696973	Putrajaya	P.maculata	PJ4	0	1	0	1	0	1	0	1.09	4.75	36.513	52.31	27.128	44.541	15.797	0.302	450	128	534	214	570	346	692	350	756	436	776	558	750	648	702	728	602	782	544	762	488	728	460	682	366	630	278	550	226	418
2.962963	101.696973	Putrajaya	P.maculata	PJ7	1	1	1	1	0	0	0	0.7	4.68	39.809	49.026	28.564	46.394	9.217	0.188	660	202	726	252	782	346	910	350	982	440	1006	580	982	682	932	760	826	814	758	792	698	760	676	720	580	666	478	566	440	426
2.962963	101.696973	Putrajaya	P.maculata	PJ8	0	1	0	0	0	1	1	1.12	3.98	32.43	43.649	23.68	39.431	11.219	0.257	662	348	708	396	750	480	842	492	886	560	896	656	872	726	830	780	760	808	714	800	686	782	666	756	570	700	506	610	484	522
2.962963	101.696973	Putrajaya	P.maculata	PJ9	1	1	0	1	0	0	1	0.89	2.85	32.612	42.343	24.482	37.728	9.731	0.23	620	336	668	378	702	454	798	464	852	548	864	634	842	712	802	750	728	778	674	766	638	738	614	686	546	644	484	568	472	488
2.962963	101.696973	Putrajaya	P.maculata	PJ11	0	1	0	1	1	0	1	0.32	1.38	22.993	34.395	16.648	28.564	11.402	0.332	594	252	648	320	676	402	744	424	782	484	792	552	778	614	746	654	688	686	650	678	618	660	602	642	520	596	452	516	440	440
2.962963	101.696973	Putrajaya	P.maculata	PJ12	0	1	0	1	0	0	1	0.44	1.89	21.377	29.398	14.548	24.382	8.021	0.273	632	357	664	399	687	454	747	463	779	506	781	575	772	618	745	651	699	666	667	655	647	638	637	618	588	585	544	537	529	490
2.962963	101.696973	Putrajaya	P.maculata	PJ15	1	1	0	1	0	1	0	1.32	6.82	46.833	61.885	34.852	58.218	15.052	0.243	624	238	698	292	764	436	892	430	960	516	990	640	976	738	922	822	798	892	716	882	666	834	634	786	546	736	426	636	376	494
2.962963	101.696973	Putrajaya	P.maculata	PJ23	1	1	1	1	0	1	0	1.9	4.18	46.244	59.901	34.458	56.536	13.657	0.228	622	214	694	260	766	396	890	400	960	482	982	598	960	698	904	784	786	852	714	836	662	804	634	768	516	706	434	616	384	478
4.2402782	101.1998491	Temoh	P.maculata	TM1	0	1	1	1	0	1	0	0.93	6.78	43.153	60.003	32.41	55.191	16.85	0.281	612	246	678	314	740	448	862	458	918	542	942	660	914	760	852	828	754	872	682	858	638	816	610	772	508	720	414	638	368	496
4.2402782	101.1998491	Temoh	P.maculata	TM4	0	1	0	1	0	1	0	1.13	4.62	40.436	57.192	30.804	49.265	16.756	0.293	596	208	668	276	734	400	840	426	886	496	894	606	860	712	808	774	710	810	658	798	612	762	586	714	504	658	412	570	384	472
4.2402782	101.1998491	Temoh	P.maculata	TM5	0	1	0	1	0	1	0	1.42	5.82	39.533	51.772	31.606	50.57	12.239	0.236	598	268	648	314	716	424	830	422	900	518	916	618	884	708	826	780	722	810	656	794	614	754	592	716	490	662	410	576	384	464
4.760768	101.12187	Kanthan Hill	P.maculata	K3	0	1	0	1	0	0	0	0.82	4.35	28.81	40.034	21.471	34.618	11.224	0.28	632	318	676	368	696	450	796	464	826	520	836	598	818	654	786	706	720	740	674	720	640	692	622	666	558	632	498	566	470	500
4.760768	101.12187	Kanthan Hill	P.maculata	K4	0	1	0	1	0	0	0	0.86	4.67	26.801	35.53	20.769	34.817	8.729	0.246	626	346	668	388	714	454	790	460	830	508	850	580	836	636	804	682	742	716	698	720	666	688	640	670	578	644	518	592	488	506
5.854506	100.448082	Guar Cempedak	P.maculata	GC1	0	1	0	1	0	0	1	0.52	2.83	34.176	41.505	25.15	39.208	7.329	0.177	632	304	676	328	724	390	816	406	856	470	870	564	854	640	818	698	752	740	686	732	630	702	610	662	544	614	484	544	460	448
5.854506	100.448082	Guar Cempedak	P.maculata	GC2	0	1	0	0	0	0	1	0.63	2.86	36.239	47.327	26.832	42.971	11.088	0.234	656	266	704	308	752	398	852	398	910	474	922	568	900	648	846	732	766	766	710	756	668	730	648	696	560	642	500	578	472	472
5.854506	100.448082	Guar Cempedak	P.maculata	GC3	0	1	0	1	0	0	1	0.56	3.1	30	38.517	22.476	36.244	8.517	0.221	604	294	656	326	696	392	778	408	822	470	836	560	814	626	768	678	702	698	660	694	624	674	600	628	534	588	470	530	450	448
5.854506	100.448082	Guar Cempedak	P.maculata	GC5	0	1	0	1	0	0	1	0.51	1.01	31.98	42.586	23.565	39.113	10.606	0.249	656	300	706	336	754	432	834	448	880	504	892	600	876	678	828	730	744	760	696	748	660	720	644	690	578	648	504	576	478	484
5.854506	100.448082	Guar Cempedak	P.maculata	GC7	1	1	0	1	0	0	1	0.83	2.37	28.713	41.189	21.089	35.256	12.476	0.303	636	302	688	354	718	444	800	456	840	524	850	602	826	666	788	712	722	742	676	728	642	708	624	674	556	626	500	566	476	482
5.854506	100.448082	Guar Cempedak	P.maculata	GC9	0	1	0	1	0	0	1	0.34	2.51	22.976	31.486	16.932	28.812	8.51	0.27	672	440	716	476	754	526	810	558	850	602	860	670	840	722	808	760	760	780	720	764	694	738	682	720	632	692	578	648	556	590
2.947621	101.858628	Semenyih	P.maculata	SY1	1	0	0	0	0	0	0	0.76	6.32	48.725	65.701	36.338	59.317	16.976	0.258	604	166	682	236	738	368	860	366	942	448	980	610	948	728	884	812	762	860	694	844	642	802	616	764	500	706	384	574	356	442
2.947621	101.858628	Semenyih	P.maculata	SY2	0	1	0	1	0	1	0	1.81	4.77	41.31	52.493	32.685	50.102	11.183	0.213	616	236	676	278	724	378	834	382	904	462	948	576	916	674	874	732	762	792	680	786	626	746	606	672	518	616	442	526	420	432
2.947621	101.858628	Semenyih	P.maculata	SY3	1	1	1	1	0	1	0	1.15	7.36	42.6	57.426	32.971	55.054	14.826	0.258	624	200	686	248	762	372	864	386	932	456	972	580	950	686	892	768	788	812	716	798	660	762	632	724	538	670	432	568	390	450
2.947621	101.858628	Semenyih	P.maculata	SY6	0	0	0	0	0	1	1	1.27	2.94	40.507	52.376	29.208	46.439	11.869	0.227	632	234	682	274	754	376	858	400	904	486	916	592	876	682	818	750	726	786	678	776	638	742	612	700	524	640	450	542	426	442
2.947621	101.858628	Semenyih	P.maculata	SY11	0	0	0	1	0	1	1	1.9	3.05	35.063	43.769	27.723	41.489	8.706	0.199	626	326	674	360	718	440	812	444	878	512	896	628	862	710	812	758	738	790	674	768	632	736	606	686	532	634	478	558	464	476
2.962963	101.696973	Putrajaya	P.canaliculata	PJ1	1	1	0	0	0	1	0	1.18	4.6	49.303	66.869	37.796	60.255	17.566	0.263	622	92	704	188	798	342	909	342	1002	436	1060	632	1026	750	950	838	776	936	690	904	640	858	609	809	512	756	361	612	310	416
2.962963	101.696973	Putrajaya	P.canaliculata	PJ5	1	1	0	1	0	1	0	1.21	6.92	41.324	56.795	32.201	51.464	15.471	0.272	518	194	594	238	672	400	780	416	872	512	908	698	854	810	774	878	702	902	614	880	552	838	512	776	442	722	340	632	274	462
3.506673	101.145072	Sekinchan	P.canaliculata	SK1	1	1	0	0	0	0	0	0.49	4.56	34.014	49.767	27.19	44.85	15.753	0.317	616	270	678	338	732	452	826	474	872	550	884	636	864	706	822	760	738	798	678	778	638	756	624	728	550	694	458	620	416	508
3.506673	101.145072	Sekinchan	P.canaliculata	SK2	0	1	0	0	0	0	1	0.48	3.11	33.22	43.659	23.883	39.03	10.439	0.239	600	328	660	362	698	448	772	466	816	540	826	624	810	690	768	748	690	784	642	776	602	742	586	718	514	680	446	602	424	516
3.506673	101.145072	Sekinchan	P.canaliculata	SK4	0	1	0	0	0	0	1	0.39	3.52	39.932	43.746	22.977	38.227	3.814	0.087	654	312	694	358	728	442	818	450	862	516	882	598	868	668	830	730	758	770	710	758	668	732	654	710	578	668	504	580	484	490
3.506673	101.145072	Sekinchan	P.canaliculata	SK7	0	1	0	0	0	0	1	0.44	3.26	22.073	34.321	17.661	29.198	12.248	0.357	580	382	622	436	664	516	714	540	740	598	744	652	724	702	696	726	644	750	608	738	582	710	564	692	512	658	460	612	444	544
3.506673	101.145072	Sekinchan	P.canaliculata	SK8	0	1	0	0	0	0	0	0.57	4.13	35.522	45.858	25.485	42.443	10.336	0.225	574	306	622	354	682	426	750	438	806	502	832	618	808	694	770	746	696	788	646	776	606	752	580	724	508	686	414	594	388	490
3.079568	101.597683	Subang Jaya	P.canaliculata	SJ1	1	1	1	1	0	1	1	1.14	2.56	48.464	76.462	40.335	58.7	27.998	0.366	610	176	730	280	768	476	892	520	942	608	948	730	912	834	852	918	740	976	646	958	574	910	530	818	446	752	372	634	342	482
3.079568	101.597683	Subang Jaya	P.canaliculata	SJ2	1	1	0	1	0	1	1	1.25	1.25	45.756	70.937	37.829	60.201	25.181	0.355	552	134	638	232	708	418	824	432	886	524	898	656	858	760	794	834	678	882	600	862	534	824	502	770	420	714	318	604	270	458
3.079568	101.597683	Subang Jaya	P.canaliculata	SJ5	0	1	0	1	0	1	1	1.26	2.95	43.948	57.893	34.214	50.275	13.945	0.241	664	166	736	214	816	362	942	376	1024	476	1056	608	1022	744	940	830	834	874	752	862	682	812	646	764	564	702	442	588	394	432
3.079568	101.597683	Subang Jaya	P.canaliculata	SJ7	0	1	0	1	0	1	0	0.96	7.8	37.326	50.669	27.195	44.549	13.343	0.263	502	318	558	380	592	468	688	472	750	544	774	650	752	754	696	824	624	848	560	834	508	782	490	718	402	666	324	590	306	510
3.079568	101.597683	Subang Jaya	P.canaliculata	SJ13	1	1	0	1	0	0	1	0.74	1.06	40.648	64.819	35.154	52.31	24.171	0.373	756	94	848	206	916	406	1028	444	1086	574	1070	722	1016	804	958	860	840	900	754	886	688	844	652	782	578	720	474	576	444	432
3.079568	101.597683	Subang Jaya	P.canaliculata	SJ14	1	1	0	1	0	1	0	1.26	5.1	42.425	57.128	32.958	53.495	14.703	0.257	660	164	736	212	816	364	948	380	1028	476	1054	624	1026	730	946	824	826	868	744	858	686	820	654	764	570	710	426	558	394	426
3.079568	101.597683	Subang Jaya	P.canaliculata	SJ17	1	1	0	1	0	1	0	1.17	5.31	54.088	74.545	42.929	66.932	20.457	0.274	584	76	680	136	764	370	922	358	1030	478	1060	682	1022	814	938	924	788	998	658	976	586	922	530	828	416	758	288	618	232	418
3.079568	101.597683	Subang Jaya	P.canaliculata	SJ20	1	1	0	1	0	0	0	1.59	4.58	36.332	50.47	27.893	44.55	14.138	0.28	554	274	596	336	650	440	738	434	796	512	810	614	786	694	734	760	658	804	604	796	562	768	538	746	458	688	380	606	350	488
3.079568	101.597683	Subang Jaya	P.canaliculata	SJ22	1	1	0	1	0	1	0	1.7	4.7	35.819	48.78	26.187	43.144	12.961	0.266	564	266	626	318	688	420	782	438	814	512	812	628	780	686	736	740	658	776	608	764	576	742	560	712	498	674	406	580	370	468
3.079568	101.597683	Subang Jaya	P.canaliculata	SJ23	1	1	0	1	0	0	0	0.88	3.02	30.108	44.85	23.478	37.331	14.742	0.329	610	308	668	374	720	478	784	498	822	564	818	644	788	708	750	756	680	790	634	776	600	744	586	728	530	686	458	604	436	510
3.079568	101.597683	Subang Jaya	P.canaliculata	SJ24	1	1	1	1	0	1	1	1.01	1.48	31.907	43.044	24.081	38.33	11.137	0.259	572	324	614	364	664	462	754	454	794	528	798	624	774	688	738	738	658	776	612	762	572	734	556	704	494	662	428	584	402	510
2.8593799	101.6270489	Paya Indah	P.canaliculata	PI1	1	1	0	1	0	0	1	0.9	3.42	37.536	51.171	27.998	45.052	13.635	0.266	568	274	632	320	675	425	751	428	802	480	832	594	811	687	770	747	664	803	621	794	578	773	540	719	470	667	412	609	364	491
2.8593799	101.6270489	Paya Indah	P.canaliculata	PI2	0	1	0	1	0	0	1	0.63	2.95	36.341	52.092	27.492	44.048	15.751	0.302	570	276	638	328	686	448	758	468	810	550	814	656	778	738	720	794	644	818	588	798	552	766	532	720	480	684	398	604	366	498
2.8593799	101.6270489	Paya Indah	P.canaliculata	PI3	1	1	0	0	0	0	1	0.67	3.25	35.936	49.974	27.195	44.75	14.038	0.281	590	286	654	332	702	440	784	452	848	544	858	626	834	712	788	774	716	806	658	796	616	764	590	732	498	678	436	614	396	498
2.8593799	101.6270489	Paya Indah	P.canaliculata	PI4	0	1	0	1	0	1	1	1.05	3.11	32.227	52.978	28.696	46.56	20.751	0.392	618	316	688	362	738	488	804	492	866	572	882	680	862	756	818	816	718	870	652	854	610	822	592	788	502	732	434	648	400	536
2.8593799	101.6270489	Paya Indah	P.canaliculata	PI5	0	1	0	1	0	0	1	0.61	2.37	34.321	48.16	25.887	42.649	13.839	0.287	642	298	712	352	766	454	846	478	890	570	888	658	858	724	814	772	736	804	682	788	648	760	628	728	560	682	500	626	454	504
4.2402782	101.1998491	Temoh	P.canaliculata	TM2	1	1	0	1	0	1	0	0.98	5.56	41.238	56.087	31.205	49.165	14.849	0.265	646	274	706	340	748	446	846	458	912	516	938	638	922	728	880	806	766	866	700	846	646	800	624	764	540	712	456	620	424	502
4.2402782	101.1998491	Temoh	P.canaliculata	TM3	0	1	0	1	0	1	0	1.41	6.34	41.04	59.298	30.904	50.976	18.258	0.308	632	236	698	314	762	446	862	462	916	540	940	672	918	764	862	816	768	854	710	840	654	806	628	750	538	702	444	610	410	496
4.2402782	101.1998491	Temoh	P.canaliculata	TM6	0	1	0	1	0	0	0	0.45	4.28	36.432	49.284	26.889	42.843	12.852	0.261	610	308	668	352	706	458	804	472	852	538	868	654	848	724	808	780	720	820	658	814	620	782	594	742	542	704	454	622	418	522
[truncated: 8 more columns]
